# Supplementary material
Source: Springer Nature journal article supplement (https://www.springermedizin.de/resource/supplementary/12885_2004_155_MOESM3_ESM.pdf/9469030)

**ABL**

1

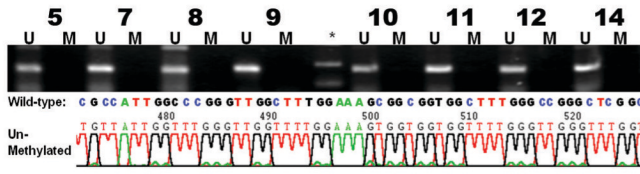

3

**APC**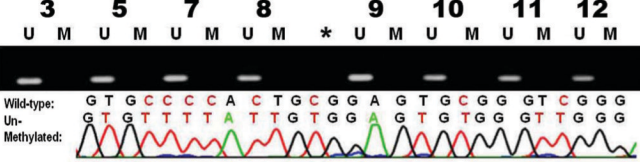

5

**BRCA1**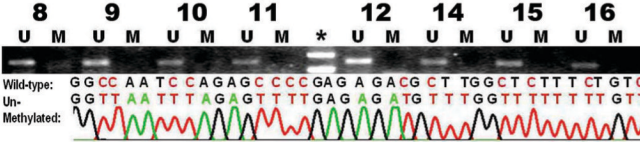

7

**CDH1**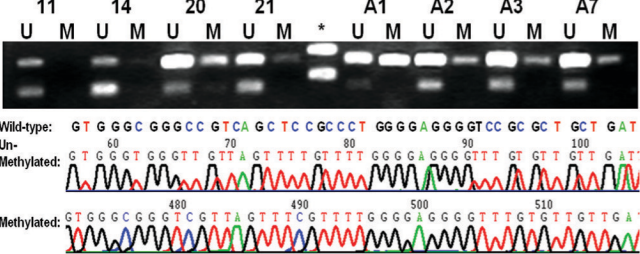

9

**CSPG2**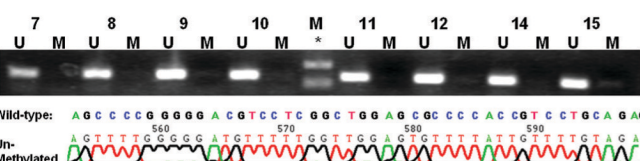

11

**DAPK1**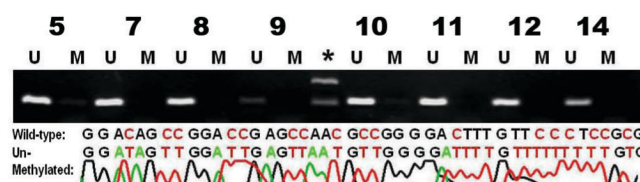**APAF1**

2

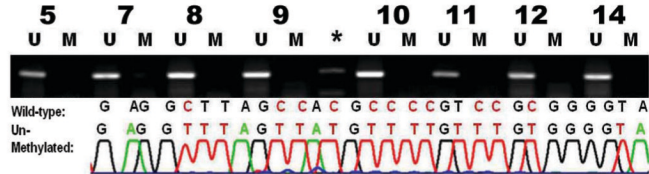

4

**AR**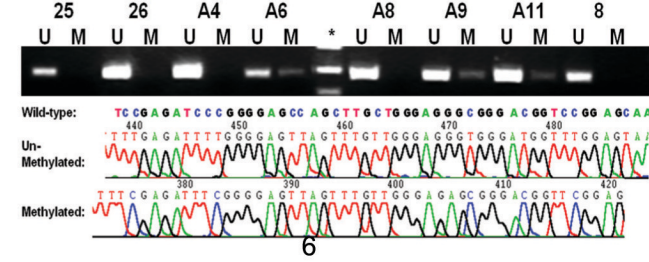

6

**CAV**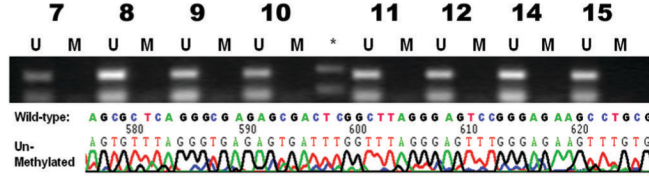

8

**CDH13**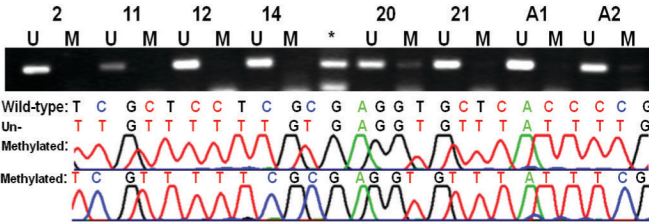

10

**cyclin a1**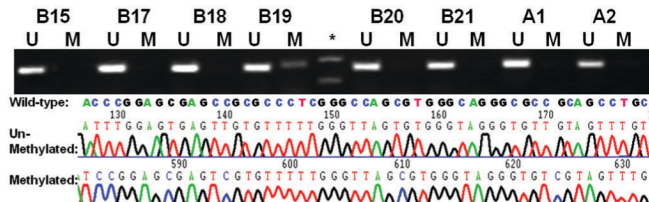

12

**DBCCR1**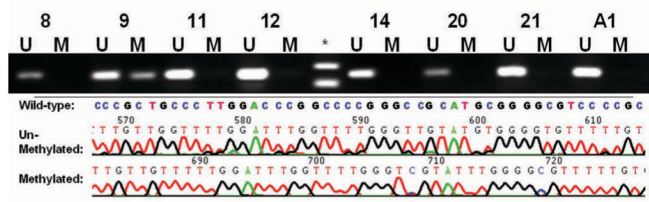

Supplement: MOESM3 [file 9469030]
